# Supplementary material for: Research progress on quadruple perovskite oxides
Source: Royal Society of Chemistry journal article supplement (doi:10.1039/d4tc01467g), 2024-01-01
Supplement: d4tc01467g1.pdf [file d4tc01467g1.pdf]

Table S1. Comparison of single perovskite oxides, double perovskite oxides, and quadruple perovskite oxides from aspects of their crystal structures and physical properties.

|                           | Single perovskite oxides                                                                                                                                                                                                                | Double perovskite oxides (DPOs)                                                                                                                                                                                     |                                                                                                                                                                                                                                         | A- and B-site-ordered quadruple perovskite oxides                                                                                                                                                                                                                                                                |
|---------------------------|-----------------------------------------------------------------------------------------------------------------------------------------------------------------------------------------------------------------------------------------|---------------------------------------------------------------------------------------------------------------------------------------------------------------------------------------------------------------------|-----------------------------------------------------------------------------------------------------------------------------------------------------------------------------------------------------------------------------------------|------------------------------------------------------------------------------------------------------------------------------------------------------------------------------------------------------------------------------------------------------------------------------------------------------------------|
|                           |                                                                                                                                                                                                                                         | A-site ordered DPOs                                                                                                                                                                                                 | B-site ordered DPOs                                                                                                                                                                                                                     |                                                                                                                                                                                                                                                                                                                  |
| General formula           | $ABO_3$                                                                                                                                                                                                                                 | $A'A''B_2O_6$                                                                                                                                                                                                       | $A_2B'B''O_6$                                                                                                                                                                                                                           | $AA'_3B'_2B''_2O_{12}$                                                                                                                                                                                                                                                                                           |
| Crystal structure         | 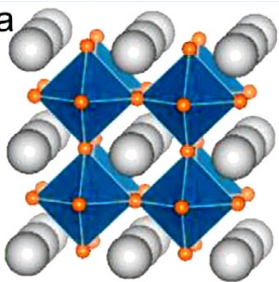 <p>Cubic, space group <math>Pm\bar{3}m</math>;</p>                                                                                                    |  <p>Cubic, space group <math>R32</math> or <math>Imm2</math>;</p>                                                                 |  <p>Cubic, space group <math>Fm\bar{3}m</math> or Monoclinic, space group <math>P2_1/n</math></p>                                                    |  <p>Cubic, space group <math>Pn\bar{3}</math></p>                                                                                                                                                                             |
| Magnetic interactions     | B-B interaction (or B-O-B interaction <i>via</i> oxygen ions)                                                                                                                                                                           | $A''-B$ , $A''-A''$ , B-B interactions                                                                                                                                                                              | $B'-B'$ , $B''-B''$ , $B'-B''$ interactions                                                                                                                                                                                             | $A'-A'$ , $A'-B'$ , $A'-B''$ , $B'-B''$ , $B'-B'$ and $B''-B''$ interactions                                                                                                                                                                                                                                     |
| Structural flexibility    | In $ABO_3$ simple perovskite (orthorhombic, $Pnma$ ) with $AO_8$ and $BO_6$ coordination environment, the B-O-B tilt angles are within the range of $140-180^\circ$ . Random arrangements of the cation distribute along 3D directions. | $A'A''B_2O_6$ double perovskite oxides have a lamella structure with a stacking sequence of $-A'O-BO_2-A''O-BO_2-$ , and $A'$ and $A''$ cations are arranged alternatively along the $[001]$ crystallographic axis. | Distorted $A_2B'B''O_6$ double perovskite (monoclinic, $P2_1/n$ ) exhibits rock-salt ordering $B'$ and $B''$ and eight-coordination $AO_8$ . $B'$ and $B''$ cations are arranged alternatively along the $[111]$ crystallographic axis. | $AA'_3B'_2B''_2O_{12}$ quadruple perovskite oxides with 1:3 ordering A-site arrangement, have icosahedral $AO_{12}$ , square planar $A'O_4$ , and $B'O_6$ and $B''O_6$ octahedra. This special perovskite family is formed in the $a^+a^+a^+$ tilt system with very large B-O-B tilt angles of $140-145^\circ$ . |
| Compositional flexibility | There are 32/54 kinds of elements that have been found at the A/B site with diverse oxidation states ranging from 1+ to 7+ and a wide range of ionic radii of $0.76 \text{ \AA}$ ( $Li^+$ )– $1.52 \text{ \AA}$                         | Layered ordering of an $A'A''B_2O_6$ perovskite results in $P4/mmm$ space group symmetry. This arrangement leads to three chemically distinct environments                                                          | The structure has extremely large tolerance to different elemental combinations of ( $B'$ and $B''$ ). To maintain the charge balance, $A_2B'B''O_6$ must satisfy                                                                       | $AA'_3B'_2B''_2O_{12}$ quadruple perovskite oxides combine the advantages of A- and B-site-ordered quadruple perovskite oxides. Unlike the A-site in the basic $ABO_3$                                                                                                                                           |

|                                                          |                                                                                                                                                                                                                                                                                                                                                                                             |                                                                                                                                                                                                                                                                                                                                                                                                                                                                                                                                                                                                                                                                                                                                                                                                                                                                                    |                                                                                                                                                                                                                                                                                                                                                                                                    |                                                                                                                                                                                                                                                                                                                                                                                                                                                                                                                       |
|----------------------------------------------------------|---------------------------------------------------------------------------------------------------------------------------------------------------------------------------------------------------------------------------------------------------------------------------------------------------------------------------------------------------------------------------------------------|------------------------------------------------------------------------------------------------------------------------------------------------------------------------------------------------------------------------------------------------------------------------------------------------------------------------------------------------------------------------------------------------------------------------------------------------------------------------------------------------------------------------------------------------------------------------------------------------------------------------------------------------------------------------------------------------------------------------------------------------------------------------------------------------------------------------------------------------------------------------------------|----------------------------------------------------------------------------------------------------------------------------------------------------------------------------------------------------------------------------------------------------------------------------------------------------------------------------------------------------------------------------------------------------|-----------------------------------------------------------------------------------------------------------------------------------------------------------------------------------------------------------------------------------------------------------------------------------------------------------------------------------------------------------------------------------------------------------------------------------------------------------------------------------------------------------------------|
|                                                          | (K <sup>+</sup> ) for A and 0.45 Å (Be <sup>2+</sup> )–1.52 Å (K <sup>+</sup> ) for B, exhibiting large flexibility of compositions that can form the crystal structure of perovskites. In theory, there are 2346 kinds of ABO <sub>3</sub> and at least 265 of them have been experimentally synthesized [1].                                                                              | for the anions a structural instability when the sizes and/or bonding strengths of the A' and A'' cations are significantly different. Thus, layered ordering of A-site cations only partially alleviates the lattice strains associated with an A'/A'' size mismatch. From an electrostatic point of view rock salt ordering must also be preferable for A-site cations, yet long-range rock salt ordering of A-site cations is very rare [2].                                                                                                                                                                                                                                                                                                                                                                                                                                    | the following equation of $2Q_A + Q_{B'} + Q_{B''} = 12$ [1]. There are thousands of the A <sub>2</sub> B'B''O <sub>6</sub> DPOs reported in the literature which were synthesized under ambient pressure [3]. Many new DPs were also synthesized at high-pressure.                                                                                                                                | perovskites, which is usually occupied by alkali-metal, alkaline-earth or rare-earth cations, the A'-site in AA' <sub>3</sub> B' <sub>2</sub> B'' <sub>2</sub> O <sub>12</sub> can accommodate transition metal ions. The introduction of A'-A', A'-B' and A'-B'' magnetic interactions in addition to B'-B'', B'-B' and B''-B'' couplings results in a variety of intriguing properties [4]. A large number of consistent elements can be introduced into A, A', B' and B''-sites by high pressure synthesis method. |
| Modulation of physical properties                        | Physical properties of the ABO <sub>3</sub> simple perovskite are controlled by partial or complete substitution of the A-/B-site cations. The B-B interaction is dominantly responsible for the physical properties.                                                                                                                                                                       | Physical properties of the A'A''B <sub>2</sub> O <sub>6</sub> double perovskites are not only controlled by the B-B interaction (mainly responsible for the properties of simple perovskites) but also the A''-A' and A''-B interactions.                                                                                                                                                                                                                                                                                                                                                                                                                                                                                                                                                                                                                                          | Instead of the B-B interaction in a simple ABO <sub>3</sub> perovskite, B'-B'' interaction mainly contributes to the physical properties of A <sub>2</sub> B'B''O <sub>6</sub> with a rock-salt ordered structure at B-site.                                                                                                                                                                       | Physical properties of the AA' <sub>3</sub> B' <sub>2</sub> B'' <sub>2</sub> O <sub>12</sub> quadruple perovskite oxides are controlled by the multiple interactions between transition metal ions, i.e., A'-A', A'-B', A'-B'', B'-B'', B'-B' and B''-B'' interactions, which are complete each other.                                                                                                                                                                                                                |
| Magnetic transition temperature ( <i>T<sub>C</sub></i> ) | Simple ABO <sub>3</sub> perovskite compounds, La <sub>0.67</sub> Ba <sub>0.33</sub> Mn <sub>1-x</sub> Cr <sub>x</sub> O <sub>3</sub> (0 ≤ x ≤ 0.15), are reported to have <i>T<sub>C</sub></i> values ranging from 275 K to 345 K [5]. The decrease of <i>T<sub>C</sub></i> is mainly interpreted by the decrease of the B-O-B bond angle and the increase of the B-O bond length as the Cr | A <sub>2</sub> B'B''O <sub>6</sub> DPOs with a 3 <i>d</i> transition metal ion at the B'-site and a 4 <i>d</i> or 5 <i>d</i> transition metal ion at the B''-site, are reported to exhibit magnetic transition temperatures ranging from ~ 200 K to ~ 800 K [6]. For example, Sr-based Sr <sub>2</sub> B'B''O <sub>6</sub> DPOs such as Sr <sub>2</sub> FeReO <sub>6</sub> ( <i>T<sub>C</sub></i> = 432 K) [7], Sr <sub>2</sub> FeWO <sub>6</sub> ( <i>T<sub>C</sub></i> ≈ 450 K) [8], Sr <sub>2</sub> FeMoO <sub>6</sub> ( <i>T<sub>C</sub></i> ≈ 420 K) [9], Sr <sub>2</sub> CrMoO <sub>6</sub> ( <i>T<sub>C</sub></i> = 450 K) [10], Sr <sub>2</sub> CrReO <sub>6</sub> ( <i>T<sub>C</sub></i> = 635 K) [1q], Sr <sub>2</sub> CrWO <sub>6</sub> ( <i>T<sub>C</sub></i> = 390 K) [12], and Sr <sub>2</sub> CrOsO <sub>6</sub> ( <i>T<sub>C</sub></i> = 725 K) [13] are reported. | In the AA' <sub>3</sub> B' <sub>2</sub> B'' <sub>2</sub> O <sub>12</sub> quadruple perovskite oxides with the <i>Pn</i> $\bar{3}$ space group, the A'-A', A'-B/B', B/B'-B/B' interactions can further enhance and/or tune the physical properties. For example, the <i>T<sub>C</sub></i> value of quadruple perovskite oxide LaCu <sub>3</sub> Fe <sub>2</sub> Re <sub>2</sub> O <sub>12</sub> was |                                                                                                                                                                                                                                                                                                                                                                                                                                                                                                                       |

|                                                |                                                                                                                                                                                                                                                    |                                                                                                                                                                                                                                                                                                                                                                                                                                                                                                                                                       |                                                                                                                                                                                                                                                                                                                                           |
|------------------------------------------------|----------------------------------------------------------------------------------------------------------------------------------------------------------------------------------------------------------------------------------------------------|-------------------------------------------------------------------------------------------------------------------------------------------------------------------------------------------------------------------------------------------------------------------------------------------------------------------------------------------------------------------------------------------------------------------------------------------------------------------------------------------------------------------------------------------------------|-------------------------------------------------------------------------------------------------------------------------------------------------------------------------------------------------------------------------------------------------------------------------------------------------------------------------------------------|
|                                                | content increases.                                                                                                                                                                                                                                 |                                                                                                                                                                                                                                                                                                                                                                                                                                                                                                                                                       | reported to be 710 K due to the strong $\text{Cu}^{2+}(\uparrow)\text{Fe}^{3+}(\uparrow)\text{Re}^{4.5+}(\downarrow)$ spin interactions [14].                                                                                                                                                                                             |
| Magnetization ( $\mu_{\text{B}}/\text{f.u.}$ ) | Simple $\text{ABO}_3$ perovskite compounds, $\text{La}_{0.67}\text{Ba}_{0.33}\text{Mn}_{1-x}\text{Cr}_x\text{O}_3$ ( $0 \leq x \leq 0.15$ ), are reported to have magnetization values ranging from 2.73 to 3.49 $\mu_{\text{B}}/\text{f.u.}$ [5]. | For $\text{A}_2\text{B}'\text{B}''\text{O}_6$ DPOs, a fully ordered state in an ideal state will result in a maximum saturation magnetization ( $M_{\text{S}}$ ). For example, in theory, $M_{\text{S}}$ is 2.0 $\mu_{\text{B}}/\text{f.u.}$ in fully ordered $\text{Bi}_2\text{FeCrO}_6$ and $\text{Bi}_2\text{NiMnO}_6$ thin films [15,16], and even higher in fully ordered $\text{La}_2\text{CoMnO}_6$ thin films, $M_{\text{S}} = 6.0 \mu_{\text{B}}/\text{f.u.}$ [17,18]. This value can be used to estimate the degree of “magnetic” ordering. | Quadruple perovskite oxide $\text{LaCu}_3\text{Fe}_2\text{Re}_2\text{O}_{12}$ has a large saturation magnetization ( $M_{\text{S}}$ ) of 8.7 $\mu_{\text{B}}/\text{f.u.}$ , which is considerably enhanced compared with those observed in $\text{A}_2\text{FeReO}_6$ ( $\text{A} = \text{Ca}, \text{Sr}$ and $\text{Ba}$ ) DPOs [19-21]. |

1. W. J. Yin, B. C. Weng, J. Ge, Q. D. Sun, Z. Z. Li and Y. F. Yan, *Energy Environ. Sci.*, 2019, **12**, 442-462.
2. M. C. Knapp and P. M. Woodward, *J. Solid State Chem.*, 2006, **179**, 1076–1085.
3. S. Vasala and M. Karppinen, *Prog. Solid State Chem.*, 2015, **43**, 1–36.
4. Y. Shimakawa and M. Mizumaki, *J. Phys.: Condens. Matter*, 2014, **26**, 473203.
5. M. Oumezzine, O. Pena, Sami Kallel, T. Guizouarn and M. Oumezzine, *J. Alloys Compd.*, 2012, **533**, 33-40.
6. T. K. Mandal, C. Felser, M. Greenblatt and J. Kübler, *Phys. Rev. B*, 2008, **78**, 134431.
7. K. Leng, Q. K. Tang, Z. W. Wu, K. Yi and X. H. Zhu, *J. Am. Ceram. Soc.*, 2022, **105**, 4097–4107.
8. F. Bardelli, C. Meneghini, S. Mobilio, S. Ray and D.D. Sarma, *J. Phys.: Condens. Matter*, 2009, **21**, 195502.
9. K.-I. Kobayashi, T. Kimura, H. Sawada, K. Terakura and Y. Tokura, *Nature*, 1998, **395**, 677–680.
10. Z. C. Wang, L. Chen, S. S. Li, J. S. Ying, F. Tang, G. Y. Gao, Y. Fang and W. Zhao, *NPJ Quantum Mater.*, 2021, **53**, 1–8.
11. L. Fuoco, D. Rodriguez, P. Tim, P.A. Maggard, *Chem. Mater.* 23 (2011) 5409–5414.
12. J. B. Philipp, P. Majewski, L. Alff, A. Erb, R. Gross, T. Graf, M. S. Brandt, J. Simon, T. Walther, W. Mader, D. Topwal and D. D. Sarma, *Phys. Rev. B*, 2003, **68**, 144431.
13. Y. Krockenberger, K. Mogare, M. Reehuis, M. Tovar, M. Jansen, G. Vaitheeswaran, V. Kanchana, F. Bultmark, A. Delin, F. Wilhelm, A. Rogalev, A. Winkler and L. Alff, *Phys. Rev. B*, 2007, **75**, 020404(R).

14. Z. Liu, S. Zhang, X. Wang, X. Ye, S. Qin, X. Shen, D. Lu, J. Dai, Y. Cao, K. Chen, F. Radu, W. -B. Wu, C. T. Chen, S. Francoual, J. R. L. Mardegan, O. Leupold, L. H. Tjeng, Z. Hu, Y. Yang and Y. Long, *Adv. Mater.*, 2022, **34**, 2200626.
15. P. Baettig and N. A. Spaldin, *Appl. Phys. Lett.*, 2005, **86**, 012505.
16. O. Dieguez and J. Iniguez, *Phys. Rev. B*, 2017, **95**, 085129.
17. H. Z. Guo, A. Gupta, T. G. Calvarese and M. A. Subramanian, *Appl. Phys. Lett.*, 2006, **89**, 262503.
18. M. P. Singh, S. Charpentier, K. D. Truong and P. Fournier, *Appl. Phys. Lett.*, 2007, **90**, 211915.
19. D. Serrate, J. M. De Teresa and M. R. Ibarra, *J. Phys.: Condens. Matter*, 2007, **19**, 023201.
20. W. Prellier, V. Smolyaninova, A. Biswas, C. Galley, R. L. Greene, K. Ramesha and J. Gopalakrishnan, *J. Phys.: Condens. Matter*, 2000, **12**, 965-973.
21. J. Gopalakrishnan, A. Chattopadhyay, S. B. Ogale, T. Venkatesan, R. L. Greene, A. J. Millis, K. Ramesha, B. Hannoyer and G. Marest, *Phys. Rev. B*, 2000, **62**, 9538-9542.

Table S2. Summaries of quadruple perovskite oxides synthesized by different methods and their crystal structures and physical properties

| Synthesized methods                                                                                                                                                                                                                                                                                                                                                  | Quadruple perovskite oxides                                                                                                                                 | Crystal structures                                                                                                                                                                                                                                                                                                                                                                                                                                                                                                                                                                                                                                             | Physical properties                                                                                                                                                                                                                                                                                                                            | Reference       |
|----------------------------------------------------------------------------------------------------------------------------------------------------------------------------------------------------------------------------------------------------------------------------------------------------------------------------------------------------------------------|-------------------------------------------------------------------------------------------------------------------------------------------------------------|----------------------------------------------------------------------------------------------------------------------------------------------------------------------------------------------------------------------------------------------------------------------------------------------------------------------------------------------------------------------------------------------------------------------------------------------------------------------------------------------------------------------------------------------------------------------------------------------------------------------------------------------------------------|------------------------------------------------------------------------------------------------------------------------------------------------------------------------------------------------------------------------------------------------------------------------------------------------------------------------------------------------|-----------------|
| Solid-state reaction (SSR) method                                                                                                                                                                                                                                                                                                                                    | <b>A-site ordered perovskite AA'B<sub>4</sub>O<sub>12</sub></b>                                                                                             |                                                                                                                                                                                                                                                                                                                                                                                                                                                                                                                                                                                                                                                                |                                                                                                                                                                                                                                                                                                                                                |                 |
|                                                                                                                                                                                                                                                                                                                                                                      | CaCu <sub>3</sub> Ti <sub>4</sub> O <sub>12</sub>                                                                                                           | Cubic, $Im\bar{3}$                                                                                                                                                                                                                                                                                                                                                                                                                                                                                                                                                                                                                                             | AFM, $T_N \approx 25$ K, $M_s = 0.56 \mu_B/\text{f.u.}$ , $\epsilon_r \sim 10286$ , $\tan \delta \sim 0.067$                                                                                                                                                                                                                                   | 1-3             |
|                                                                                                                                                                                                                                                                                                                                                                      | ACu <sub>3</sub> Ru <sub>4</sub> O <sub>12</sub> (A = Ca, La, and Nd)                                                                                       |                                                                                                                                                                                                                                                                                                                                                                                                                                                                                                                                                                                                                                                                |                                                                                                                                                                                                                                                                                                                                                |                 |
|                                                                                                                                                                                                                                                                                                                                                                      | CaCu <sub>3</sub> Ru <sub>4</sub> O <sub>12</sub><br>LaCu <sub>3</sub> Ru <sub>4</sub> O <sub>12</sub><br>NdCu <sub>3</sub> Ru <sub>4</sub> O <sub>12</sub> | Cubic, $Im\bar{3}$                                                                                                                                                                                                                                                                                                                                                                                                                                                                                                                                                                                                                                             | PM, $M_s = 0.32 \mu_B/\text{f.u.}$ , $\rho_{0(1.5\text{K})} = 0.110 \text{ m}\Omega \cdot \text{cm}$<br>$\rho_{0(1.5\text{K})} = 0.313 \text{ m}\Omega \cdot \text{cm}$ , $\rho_{300\text{K}} = 1.28 \text{ m}\Omega \cdot \text{cm}$ , $\Theta = 390$ K<br>$\rho_{0(1.5\text{K})} = 0.474 \text{ m}\Omega \cdot \text{cm}$ , $\Theta = 390$ K | 4,5<br>6,7<br>6 |
|                                                                                                                                                                                                                                                                                                                                                                      | <b>A-site columnar-ordered perovskite A<sub>2</sub>A'A''B<sub>4</sub>O<sub>12</sub></b>                                                                     |                                                                                                                                                                                                                                                                                                                                                                                                                                                                                                                                                                                                                                                                |                                                                                                                                                                                                                                                                                                                                                |                 |
|                                                                                                                                                                                                                                                                                                                                                                      | CaMnTi <sub>2</sub> O <sub>6</sub> (HT-HP)                                                                                                                  | Tetragonal, $P4_2mc$                                                                                                                                                                                                                                                                                                                                                                                                                                                                                                                                                                                                                                           | $T_c = 630$ K, $P = 24 \mu\text{C}/\text{cm}^2$ , $P_r = 3.5 \mu\text{C}/\text{cm}^2$ , $E_c = 53 \text{ kV}/\text{cm}$                                                                                                                                                                                                                        | 8               |
|                                                                                                                                                                                                                                                                                                                                                                      | CaFeTi <sub>2</sub> O <sub>6</sub> (HT-HP)                                                                                                                  | Tetragonal,<br>$P4_2/nmc$                                                                                                                                                                                                                                                                                                                                                                                                                                                                                                                                                                                                                                      | -                                                                                                                                                                                                                                                                                                                                              | 9               |
|                                                                                                                                                                                                                                                                                                                                                                      | MnLaMnSbO <sub>6</sub><br>MnPrMnSbO <sub>6</sub><br>MnNdMnSbO <sub>6</sub><br>MnSmMnSbO <sub>6</sub> (HT-HP)                                                | Tetragonal, $P4_2/n$                                                                                                                                                                                                                                                                                                                                                                                                                                                                                                                                                                                                                                           | $T_c = 48$ K, $\mu_{th} = 8.37 \mu_B/\text{f.u.}$<br>$T_c = 89$ K, $T_{N2} = 75$ K, $\mu_{th} = 9.12 \mu_B/\text{f.u.}$<br>$T_c = 76$ K, $T_{N2} = 42$ K, $\mu_{th} = 9.14 \mu_B/\text{f.u.}$ , $\mu_{exp} = 8.9 \mu_B/\text{f.u.}$<br>$T_c = 48$ K, $T_{N2} = 39$ K, $\mu_{th} = 8.5 \mu_B/\text{f.u.}$ , $\mu_{exp} = 8.3 \mu_B/\text{f.u.}$ | 10              |
| SmMnGaTiO <sub>6</sub><br>GdMnGaTiO <sub>6</sub> (HT-HP)                                                                                                                                                                                                                                                                                                             | Tetragonal,<br>$P4_2/nmc$                                                                                                                                   | $\mu_{eff} = 6.21 \mu_B/\text{f.u.}$ , $M_s = 2.5 \mu_B/\text{f.u.}$ , $C = 4.82 \text{ emu K}$ , $T_N = 3$ K<br>$\mu_{eff} = 9.75 \mu_B/\text{f.u.}$ , $M_s = 11 \mu_B/\text{f.u.}$ , $C = 11.88 \text{ emu K}$ , $T_N = 3$ K                                                                                                                                                                                                                                                                                                                                                                                                                                 | 11                                                                                                                                                                                                                                                                                                                                             |                 |
| RMnMn <sub>2</sub> O <sub>6</sub> (R=Gd-Tm and Y) (HTHP)<br>Tm <sub>0.88</sub> Mn <sub>3</sub> O <sub>5.82</sub><br>Er <sub>0.88</sub> Mn <sub>3</sub> O <sub>5.82</sub><br>Ho <sub>0.9</sub> Mn <sub>3</sub> O <sub>5.85</sub><br>Y <sub>0.9</sub> Mn <sub>3</sub> O <sub>5.85</sub><br>DyMn <sub>3</sub> O <sub>6</sub><br>GdMn <sub>2.833</sub> O <sub>5.75</sub> | Orthorhombic,<br>$Pmmn$                                                                                                                                     | $\mu_{eff} = 10.608 \mu_B/\text{f.u.}$ , $M_s = 6.4 \mu_B/\text{f.u.}$ , $T_{N1} = 75$ K, $T_{N2} = 20$ K<br>$\mu_{eff} = 12.318 \mu_B/\text{f.u.}$ , $M_s = 6.97 \mu_B/\text{f.u.}$ , $T_{N1} = 68$ K, $T_{N2} = 21$ K<br>$\mu_{eff} = 12.917 \mu_B/\text{f.u.}$ , $M_s = 6.89 \mu_B/\text{f.u.}$ , $T_{N1a} = 69$ K, $T_{N1b} = 65$ K<br>$\mu_{eff} = 8.027 \mu_B/\text{f.u.}$ , $M_s = 3.05 \mu_B/\text{f.u.}$ , $T_{N1a} = 69$ K, $T_{N1b} = 65$ K<br>$\mu_{eff} = 13.444 \mu_B/\text{f.u.}$ , $M_s = 7.18 \mu_B/\text{f.u.}$ , $T_{N1} = 58$ K, $T_{N2} = 46$ K<br>$\mu_{eff} = 11.095 \mu_B/\text{f.u.}$ , $M_s = 6.39 \mu_B/\text{f.u.}$ , $T_N = 87$ K | 12                                                                                                                                                                                                                                                                                                                                             |                 |
| Solid-state reaction (SSR) method                                                                                                                                                                                                                                                                                                                                    |                                                                                                                                                             |                                                                                                                                                                                                                                                                                                                                                                                                                                                                                                                                                                                                                                                                |                                                                                                                                                                                                                                                                                                                                                |                 |

|                |                                                                                                                                                                                     |                                                                                         |                                                                                                                                                                                                                                                |    |
|----------------|-------------------------------------------------------------------------------------------------------------------------------------------------------------------------------------|-----------------------------------------------------------------------------------------|------------------------------------------------------------------------------------------------------------------------------------------------------------------------------------------------------------------------------------------------|----|
|                | CaMnMnReO <sub>6</sub> (HT-HP)<br>Ca(Mn <sub>0.5</sub> Cu <sub>0.5</sub> )FeReO <sub>6</sub>                                                                                        | Tetragonal, $P4_2/n$                                                                    | $T_{N1}=100$ K, $T_{N2}=120$ K, $M_s=3.4$ $\mu_B$ /f.u.<br>$T_{N1}=160$ K, $T_{N2}=560$ K, $M_s=4.8$ $\mu_B$ /f.u.                                                                                                                             | 13 |
|                | <b>A- and B-site multiply ordered perovskite AA'B<sub>2</sub>B'<sub>2</sub>O<sub>12</sub></b>                                                                                       |                                                                                         |                                                                                                                                                                                                                                                |    |
|                | LaCu <sub>3</sub> Fe <sub>2</sub> TiSbO <sub>12</sub>                                                                                                                               | Cubic, $Im\bar{3}$                                                                      | AFM, $T_{N1}=60$ K, $T_{N2}=160$ K, $M_s=1.2$ $\mu_B$ /f.u.                                                                                                                                                                                    | 14 |
|                | <b>Hexagonal quadruple perovskite oxides</b>                                                                                                                                        |                                                                                         |                                                                                                                                                                                                                                                |    |
|                | Ba <sub>4</sub> BiIr <sub>3</sub> O <sub>12</sub>                                                                                                                                   | Hexagonal, $C2/m$                                                                       | $T_N=215$ K, $\mu_{\text{eff}}=0.22$ $\mu_B$ /Ir.                                                                                                                                                                                              | 15 |
|                | Ba <sub>4</sub> EuRu <sub>3</sub> O <sub>12</sub><br>Ba <sub>4</sub> EuIr <sub>3</sub> O <sub>12</sub>                                                                              | Hexagonal, $C2/m$                                                                       | AFM, $T_N=4$ K, $\mu_{\text{eff}}=1.18$ $\mu_B$ /f.u., $E_a=0.18$ eV<br>PM, $E_a=0.22$ eV, $\Theta_p = -0.773$ K                                                                                                                               | 16 |
|                | Ba <sub>4</sub> LuRu <sub>3</sub> O <sub>12</sub><br>Ba <sub>4</sub> NdRu <sub>3</sub> O <sub>12</sub>                                                                              | Hexagonal, $R-3m$<br>Hexagonal, $C2/m$                                                  | AFM, $\mu_{\text{eff}}=2.86$ $\mu_B$ /f.u., $T_N=8$ K<br>FiM, $\mu_{\text{eff}}=4.7$ $\mu_B$ /f.u., $T_N=11.5$ K                                                                                                                               | 17 |
|                | Ba <sub>4</sub> CuNb <sub>3</sub> O <sub>12</sub>                                                                                                                                   | Hexagonal,<br>$P6_3/mmc$                                                                | -                                                                                                                                                                                                                                              | 18 |
|                | <b>A-site ordered perovskite AA'B<sub>4</sub>O<sub>12</sub></b>                                                                                                                     |                                                                                         |                                                                                                                                                                                                                                                |    |
| Sol-gel method | CaCu <sub>2</sub> MnTi <sub>3</sub> MnO <sub>12</sub>                                                                                                                               | Cubic, $Im\bar{3}$                                                                      | AFM, $\mu_{\text{eff}}=3.85$ $\mu_B$ /f.u., $\epsilon_r \sim 2040$                                                                                                                                                                             | 19 |
|                | CdCu <sub>3</sub> Fe <sub>4</sub> O <sub>12</sub>                                                                                                                                   | Cubic, $Im\bar{3}$                                                                      | FM/AFM, $T_c = 190$ K, $T_N=170$ K, $M_s=1.6$ $\mu_B$ /f.u.                                                                                                                                                                                    | 20 |
|                | LaCu <sub>3</sub> Mn <sub>3</sub> TiO <sub>12</sub><br>LaCu <sub>3</sub> Mn <sub>3.5</sub> Ti <sub>0.5</sub> O <sub>12</sub><br>LaCu <sub>2</sub> Mn <sub>4</sub> TiO <sub>12</sub> | Cubic, $Im\bar{3}$                                                                      | AFM, $T_c=230$ K, $M_s=8.6$ $\mu_B$ /f.u., $M_{\text{cal}}=7$ $\mu_B$ /f.u.<br>AFM, $T_c=235$ K, $M_s=10.4$ $\mu_B$ /f.u., $M_{\text{cal}}=8.5$ $\mu_B$ /f.u.<br>AFM, $T_c=225$ K, $M_s=10.82$ $\mu_B$ /f.u., $M_{\text{cal}}=9$ $\mu_B$ /f.u. | 21 |
|                | <b>A- and B-site multiply ordered perovskite AA'B<sub>2</sub>B'<sub>2</sub>O<sub>12</sub></b>                                                                                       |                                                                                         |                                                                                                                                                                                                                                                |    |
|                | CaCu <sub>3</sub> Fe <sub>2</sub> Sb <sub>2</sub> O <sub>12</sub>                                                                                                                   | Cubic, $Pn\bar{3}$                                                                      | AFM, $T_N=160$ K, $M_s=5.35$ $\mu_B$ /f.u., $\rho > 10^7$ $\Omega$                                                                                                                                                                             | 22 |
|                |                                                                                                                                                                                     | <b>A-site columnar-ordered perovskite A<sub>2</sub>A'A''B<sub>4</sub>O<sub>12</sub></b> |                                                                                                                                                                                                                                                |    |
|                | Y <sub>2</sub> CuMnMn <sub>4</sub> O <sub>12</sub>                                                                                                                                  | $Pm\bar{m}n$                                                                            | PM, $T_N=175$ K/159K                                                                                                                                                                                                                           | 26 |

|                                                    |                                                                                                              |                                                                                   |                                                                                                                                                                                                                         |    |
|----------------------------------------------------|--------------------------------------------------------------------------------------------------------------|-----------------------------------------------------------------------------------|-------------------------------------------------------------------------------------------------------------------------------------------------------------------------------------------------------------------------|----|
| High temperature and high pressure                 | $\text{Ho}_2\text{MnGaMn}_4\text{O}_{12}$                                                                    | $P4_2/nmc$                                                                        | $\mu_{\text{eff}}=18.428 \mu_{\text{B}}/\text{f.u.}$ , $\Theta_{\text{p}} = -21.5(3) \text{ K}$                                                                                                                         | 27 |
|                                                    | $\text{Dy}_2\text{CuMnMn}_4\text{O}_{12}$                                                                    | $Pm\bar{m}n$                                                                      | $T_{\text{N}1}=160 \text{ K}$ , $T_{\text{N}2}=125 \text{ K}$ , $T_{\text{N}3}=21 \text{ K}$                                                                                                                            | 27 |
|                                                    | $\text{Y}_2\text{CuMnMn}_4\text{O}_{12}$                                                                     | $Pm\bar{m}n$                                                                      | PM, $T_{\text{N}}=175\text{K}/159\text{K}$                                                                                                                                                                              | 26 |
|                                                    | <b>A- and B-site multiply ordered perovskite <math>\text{AA}'_3\text{B}_2\text{B}'_2\text{O}_{12}</math></b> |                                                                                   |                                                                                                                                                                                                                         |    |
|                                                    | $\text{CaCu}_3\text{Co}_2\text{Re}_2\text{O}_{12}$                                                           | Cubic, $Pn\bar{3}$                                                                | FiM/FM, $\mu_{\text{eff}}=10.09 \mu_{\text{B}}/\text{f.u.}$ , $M_{\text{s}}=4 \mu_{\text{B}}/\text{f.u.}$ , $T_{\text{c}}=20 \text{ K}$ , $T_{\text{N}}=28 \text{ K}$ , $C=12.1 \text{ emu K Oe}^{-1} \text{ mol}^{-1}$ | 28 |
|                                                    | $\text{CaCu}_3\text{Fe}_2\text{Re}_2\text{O}_{12}$                                                           | Cubic, $Pn\bar{3}$                                                                | FiM, $M_{\text{s}}=8.7 \mu_{\text{B}}/\text{f.u.}$ , $T_{\text{c}} = 560 \text{ K}$ , $T_{\text{N}}= 28 \text{ K}$ , $\rho=10 \text{ m}\Omega \cdot \text{cm}$                                                          | 29 |
|                                                    | $\text{LaMn}_3\text{Ni}_2\text{Mn}_2\text{O}_{12}$                                                           | Cubic, $Pn\bar{3}$                                                                | FM, $M_{\text{s}}=6.6 \mu_{\text{B}}/\text{f.u.}$ , $T_{\text{c}}=34 \text{ K}$ , $T_{\text{N}}= 46 \text{ K}$                                                                                                          | 30 |
| $\text{NaCu}_3\text{Fe}_2\text{Os}_2\text{O}_{12}$ | Cubic, $Pn\bar{3}$                                                                                           | FiM, $T_{\text{c}}=380 \text{ K}$ , $M_{\text{s}}=5.5 \mu_{\text{B}}/\text{f.u.}$ | 31                                                                                                                                                                                                                      |    |

FM: Ferromagnetic; AFM: Antiferromagnetic; PM: Paramagnetic; FiM Ferrimagnetic,  $T_{\text{N}}$ : Neel temperature;  $T_{\text{c}}$ : Curie temperatures;  $\rho$ : Electrical resistivity;  $\rho_0$ : Residual resistivity;  $\Theta$ : Einstein temperature;  $E_{\text{c}}$ : Coercive field;  $P$ : Spontaneous Polarization;  $\mu_{\text{eff}}$ : Effective moment;  $\mu_{\text{th}}$ : Theoretical moment;  $\mu_{\text{exp}}$ : Experimental moments;  $C$ : Curie constants;  $E_{\text{a}}$ : Activation energies;  $\Theta_{\text{p}}$ : Curie-Weiss temperature;  $M_{\text{cal}}$ : Calculated magnetization;  $M_{\text{s}}$ : Saturation magnetization;  $\epsilon$ : Dielectric constant;  $\tan \delta$ : Dielectric loss.

## Reference

1. P. Y. Raval, P. R. Pansara, A. R. Makadiya, N. H. Vasoya, S. N. Dolia and K. B. Modi, *Ceram. Int.*, 2018, **44**, 17667-17674.
2. M. A. Subramanian, D. Li, N. Duan, B. A. Reisner and A. W. Sleight, *J. Solid State Chem.*, 2000, **151**, 323-325.
3. J. K. Bidika, A. Chauhan and B. R. K. Nanda, *Phys. Rev. B*, 2022, **106**, 115152.
4. T. Kida, R. Kammuri, M. Hagiwara, S. Yoshii, W. Kobayashi, M. Iwakawa and I. Terasaki, *Phys. Rev. B*, 2012, **85**, 195122.
5. A. Krimmel, A. Günther, W. Kraetschmer, H. Dekinger, N. Büttgen, A. Loidl, S. G. Ebbinghaus, E. W. Scheidt and W. Scherer, *Phys. Rev. B*, 2008, **78**, 165126.
6. A. Günther, S. Riegg, W. Kraetschmer, S. Wehrmeister, N. Büttgen, E. W. Scheidt, H. A. K. von Nidda, M. V. Eremin, E. A. Arkipova, R. M. Eremina, A. Krimmel, H. Mutka and A. Loidl, *Phys. Rev. B*, 2020, **102**, 235136.
7. S. Hébert, R. Daou and A. Maignan, *Phys. Rev. B*, 2015, **91**, 045106.
8. A. Aimi, D. Mori, K.-i. Hiraki, T. Takahashi, Y. J. Shan, Y. Shirako, J. Zhou and Y. Inaguma, *Chem. Mater.*, 2014, **26**, 2601-2608.
9. K. Leinenweber and J. Parise, *J. Solid State Chem.*, 1995, **114**, 277-281.
10. E. Solana-Madruga, A. M. Arevalo-Lopez, A. J. Dos Santos-Garcia, E. Urones-Garrote, D. Avila-Brandé, R. Saez-Puche and J. P. Attfield, *Angew. Chem., Int. Ed.*, 2016, **55**,

9340-9344.

11. G. Shimura, K. Niwa, Y. Shirako and M. Hasegawa, *Eur. J. Inorg. Chem.*, 2017, **2017**, 835-839.
12. L. Zhang, Y. Matsushita, K. Yamaura and A. A. Belik, *Inorg Chem.*, 2017, **56**, 5210-5218.
13. G. M. McNally, Á. M. Arévalo-López, P. Kearins, F. Orlandi, P. Manuel and J. P. Attfield, *Chem. Mater.*, 2017, **29**, 8870-8874.
14. L. Kumar, J. Datta, S. Sen, P. P. Ray and T. K. Mandal, *J. Solid State Chem.*, 2021, 302.
15. W. Miiller, M. T. Dunstan, Z. Huang, Z. Mohamed, B. J. Kennedy, M. Avdeev and C. D. Ling, *Inorg Chem.*, 2013, **52**, 12461-12467.
16. Y. Shimoda, Y. Doi, M. Wakeshima and Y. Hinatsu, *Inorg Chem.*, 2009, **48**, 9952-9957.
17. Y. Shimoda, Y. Doi, M. Wakeshima and Y. Hinatsu, *J. Solid State Chem.*, 2010, **183**, 1962-1969.
18. N. Kumada, W. Zhang, Q. Dong, T. Mochizuki, Y. Yonesaki, T. Takei and N. Kinomura, *Powder Diffr.*, 2012, **26**, 244-247.
19. K. Pal, A. Dey, P. P. Ray, N. E. Mordvinova, O. I. Lebedev, T. K. Mandal, M. M. Seikh and A. Gayen, *ChemistrySelect*, 2018, **3**, 1076-1087.
20. I. Yamada, A. Takamatsu, N. Hayashi and H. Ikeno, *Inorg Chem.*, 2017, **56**, 9303-9310.
21. A. Haque, R. Das, M. Vasundhara, D. Ghosh, A. Gayen, P. Mahata, A. K. Kundu and M. M. Seikh, *J. Alloys Compd.*, 2021, **875**, 159984.
22. S. A. Larregola, J. Zhou, J. A. Alonso, V. Pomjakushin and J. B. Goodenough, *Inorg Chem.*, 2014, **53**, 4281-4283.
23. Y. Okazaki, Y. Kato, Y. Kizawa, S. Oda, K. Uemura, T. Nishio, F. Fujii, S. Fujinari, M. Kinoshita, T. Odake, H. Togano, T. Kamegawa, S. Kawaguchi, H. Yamamoto, H. Ikeno, S. Yagi, K. Wada, K. H. Ahn, A. Hariki and I. Yamada, *Inorg Chem.*, 2021, **60**, 7023-7030.
24. J. Guo, S. Y. Wang, W. M. Li, D. B. Lu, X. B. Ye, Z. H. Liu, S. J. Qin, X. Wang, Z. W. Hu, H. J. Lin, C. T. Chen, J. G. Wan, Q. F. Zhang and Y. W. Long, *Phys. Rev. B*, 2022, **105**, 054409.
25. H. Etani, I. Yamada, K. Ohgushi, N. Hayashi, Y. Kusano, M. Mizumaki, J. Kim, N. Tsuji, R. Takahashi, N. Nishiyama, T. Inoue, T. Irifune and M. Takano, *J. Am. Chem. Soc.*, 2013, **135**, 6100-6106.
26. A. M. Vibhakar, D. D. Khalyavin, P. Manuel, J. Liu, A. A. Belik and R. D. Johnson, *Phys. Rev. Lett.*, 2020, **124**, 127201.
27. A. A. Belik, D. D. Khalyavin, L. Zhang, Y. Matsushita, Y. Katsuya, M. Tanaka, R. D. Johnson and K. Yamaura, *Chemphyschem*, 2018, **19**, 2449-2452.
28. Z. H. Liu, X. Wang, X. B. Ye, X. D. Shen, Y. C. Bian, W. Ding, S. Agrestini, S. C. Liao, H. J. Lin, C. T. Chen, S. C. Weng, K. Chen, P. Ohresser, L. Nataf, F. Baudelet, Z. G. Sheng, S. Francoual, J. R. L. Mardegan, O. Leupold, Z. F. Li, X. K. Xi, W. H. Wang, L. H. Tjeng, Z. W. Hu and Y. W. Long, *Phys. Rev. B*, 2021, **103**, 014414.
29. W. T. Chen, M. Mizumaki, H. Seki, M. S. Senn, T. Saito, D. Kan, J. P. Attfield and Y. Shimakawa, *Nat. Commun.*, 2014, **5**, 3909.
30. Y.-Y. Yin, M. Liu, J.-H. Dai, X. Wang, L. Zhou, H. Cao, C. dela Cruz, C.-T. Chen, Y. Xu, X. Shen, R. Yu, J. A. Alonso, A. Muñoz, Y.-F. Yang, C. Jin, Z. Hu and Y. Long, *Chem. Mater.*, 2016, **28**, 8988-8996.
31. X. Wang, M. Liu, X. Shen, Z. Liu, Z. Hu, K. Chen, P. Ohresser, L. Nataf, F. Baudelet, H. J. Lin, C. T. Chen, Y. L. Soo, Y. F. Yang, C. Jin and Y. Long, *Inorg Chem.*, 2019, **58**, 320-326.
